# Supplementary material for: Comparative Cytotoxicity Study of Silver Nanoparticles (AgNPs) in a Variety of Rainbow Trout Cell Lines (RTL-W1, RTH-149, RTG-2) and Primary Hepatocytes
Source: PubMed Central journal article supplement (PMC4454974; doi:10.3390/ijerph120505386), 2015-05-20
Supplement: ijerph-12-05386-s001.pdf [file ijerph-12-05386-s001.pdf]

## Comparative Cytotoxicity Study of Silver Nanoparticles (AgNPs) in a Variety of Rainbow Trout Cell Lines (RTL-W1, RTH-149, RTG-2) and Primary Hepatocytes

**Table S1.** Composition of L-15, EMEM(pyr), EMEM(NEAA) and M199 complex culture media used to prepare AgNM-300K suspensions and expose the cell lines and primary hepatocytes.

| Cell Line                                                                  | RTL-W1               | RTH-149      | RTG-2         | Primary Hepatocytes |
|----------------------------------------------------------------------------|----------------------|--------------|---------------|---------------------|
| Cell culture medium                                                        | Leibovitz L-15       | EMEM (pyr)   | EMEM (NEAA)   | M199                |
| Component                                                                  | Concentration (mg/L) |              |               |                     |
| Inorganic Salts                                                            |                      |              |               |                     |
| Calcium chloride (CaCl <sub>2</sub> ) (anhyd.)/(dihyd)                     | 140 (anhyd.)         | 265 (dihyd.) | 265 (dihyd.)  | 200 (anhyd.)        |
| Potassium chloride (KCL)                                                   | 400                  | 400          | 400           | 400                 |
| Sodium chloride (NaCL)                                                     | 8000                 | 6800         | 6800          | 6800                |
| Ferric nitrate (monohyd.)                                                  | –                    | –            | –             | 0.720               |
| Magnesium chloride                                                         | 93.67                | –            | –             | –                   |
| Magnesium sulphate (anhyd.)                                                | 97.70                | 200          | 200           | 97.67               |
| Sodium acetate (anhydr.)                                                   | –                    | 200          | 200           | 50                  |
| Potassium phosphate (KH <sub>2</sub> PO <sub>4</sub> )                     | 60                   | –            | –             | –                   |
| Sodium phosphate (NaH <sub>2</sub> PO <sub>4</sub> ) (monohyd.)/(anhyd.) * | 190 *                | 140          | 140           | 140                 |
| Sodium bicarbonate (NaHCO <sub>3</sub> )                                   | –                    | 2200         | 2200          | –                   |
| Sodium pyruvate                                                            | 550                  | 110 (Added)  | –             | –                   |
| Amino Acids                                                                |                      |              |               |                     |
| D/L-Alanine                                                                | 450                  | –            | 8.9 (Added)   | 25                  |
| L-Arginine/L-Arginine HCL *                                                | 500                  | 126.4 *      | 126.4 *       | 70                  |
| L-Asparagine                                                               | 250                  | –            | 13.21 (Added) | –                   |
| L-Aspartic acid                                                            | –                    | –            | 13.30 (Added) | 30                  |
| L-Cysteine/L-Cysteine HCL (monohyd.) *                                     | 120                  | 24           | 24            | 26 *                |
| L-Glutamine                                                                | 292 (Added)          | 292          | 292           | 100                 |
| L-Glutamic acid                                                            | –                    | –            | 14.7 (Added)  | 67                  |
| Glycine                                                                    | 200                  | –            | 7.5 (Added)   | 50                  |
| L-Histidine/L-Histidine HCL (monohyd.) *                                   | 250                  | 42 *         | 42 *          | 21.88 *             |

Table S1. Cont.

| Cell Line                                      | RTL-W1 | RTH-149 | RTG-2           | Primary Hepatocytes |
|------------------------------------------------|--------|---------|-----------------|---------------------|
| D/L-Isoleucine                                 | 250    | 52.4    | 52.4            | 20                  |
| L-Leucine                                      | 125    | 52.4    | 52.4            | 60                  |
| L-Lysine/L-Lysine HCL *                        | 75     | 73 *    | 73 *            | 15 *                |
| D/L-Methionine                                 | 150    | 15      | 15              | 25                  |
| D/L-Phenylalanine                              | 250    | 33      | 33              | 25                  |
| L-Serine                                       | 200    | –       | 19.5<br>(Added) | 25                  |
| L-Proline/Hydroxy<br>L-Proline *               | –      | –       | 11.5<br>(Added) | 40/10 *             |
| D/L-Threonine                                  | 600    | 47.6    | 47.6            | 30                  |
| L-Tyrosine/L-Tyrosine 2Na (dihyd.) *           | 370 *  | 36.2    | 36.2            | 57.66 *             |
| L-Tryptophan                                   | 20     | 10.2    | 10.2            | 10                  |
| D/L-Valine                                     | 200    | 46.8    | 46.8            | 25                  |
| Vitamins                                       |        |         |                 |                     |
| Ascorbic acid                                  |        |         |                 | 0.05                |
| Biotin                                         |        |         |                 | 0.1                 |
| Choline chloride                               | 1      | 1       | 1               | 0.5                 |
| D/L-Ca Pantothenate                            | 1      | 1       | 1               | 0.01                |
| Ergocalciferol                                 | –      |         |                 | 0.1                 |
| i-inositol                                     | 2      | 2       | 2               | 0.05                |
| Folic acid                                     | 1      | 1       | 1               | 0.01                |
| Menadione                                      | –      |         |                 | 0.01                |
| Niacin                                         | –      |         |                 | 0.025               |
| Nicotinamide                                   | 1      | 1       | 1               | 0.025               |
| 4-Aminobenzoic acid (PABA)                     | –      |         |                 | 0.05                |
| Pyridoxal HCL                                  | –      |         |                 | 0.025               |
| Pyridoxine HCL                                 | 1      | 1       | 1               | 0.025               |
| Riboflavin/Riboflavin -5-PO <sub>4</sub> Na *  | 0.1 *  | 0.1     | 0.1             | 0.01                |
| Thiamine HCL/Thiamine monophosphate *          | 1 *    | 1       | 1               | 0.01                |
| DL- $\alpha$ -tocopherol phosphate 2Na         | –      | –       | –               | 0.01                |
| Vitamin A acetate                              | –      | –       | –               | 0.14                |
| Other components                               |        |         |                 |                     |
| Adenine Sulphate (dihydr.)                     | –      | –       | –               | 10.98               |
| Adenosine 5'-monophosphate (AMP)<br>(monohyd.) | –      | –       | –               | 0.2                 |
| Adenosine 5'-triphosphate (ATP) 2Na (trihyd.)  | –      | –       | –               | 1.098               |
| Cholesterol (synthetic)                        | –      | –       | –               | 0.2                 |
| 2-deoxy-d-ribose                               | –      | –       | –               | 0.5                 |
| Dextrose                                       | –      | –       | –               | 1000                |
| L-Glutathione (reduced)                        | –      | –       | –               | 0.05                |

Table S1. Cont.

| Cell Line                | RTL-W1      | RTH-149     | RTG-2       | Primary Hepatocytes |
|--------------------------|-------------|-------------|-------------|---------------------|
| Guanine HCL (monohyd.)   | –           | –           | –           | 0.3                 |
| Hypoxanthine Na          | –           | –           | –           | 0.345               |
| D-Ribose                 | –           | –           | –           | 0.5                 |
| Thymine                  | –           | –           | v           | 0.3                 |
| Tween 80                 | –           | –           | –           | 20                  |
| Uracil                   | –           | v           | –           | 0.3                 |
| D(+)-Galactose/Glucose   | 900         | 1000        | 1000        | 1000                |
| Phenol Red Na            | 10          | 10          | 10          | 21.24               |
| Penicillin               | 10000 U/mL  | 10000 U/mL  | 10000 U/mL  | –                   |
| Streptomycin             | 10          | 10          | 10          | –                   |
| Xanthine Na              | –           | –           | –           | 0.344               |
| Serum                    |             |             |             |                     |
| Fetal bovine serum (FBS) | 10% (Added) | 10% (Added) | 10% (Added) | 10% (Added)         |

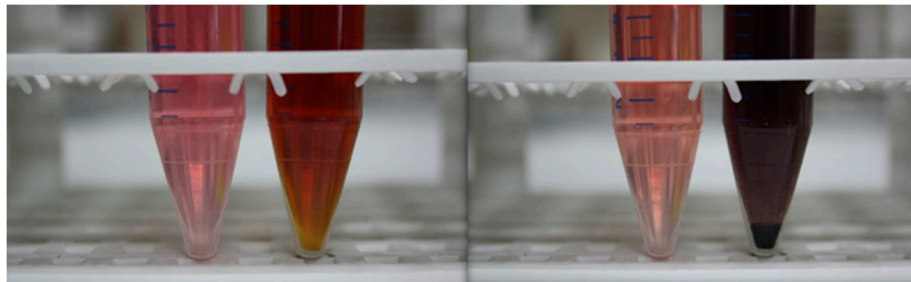

(a)

(b)

Figure 1. Contrasting appearance of NM-300K suspensions (93.45 µg/mL)(right side) prepared in EMEM culture medium (a) and L-15 culture medium (b) compared to respective medium only (left side).

(a)

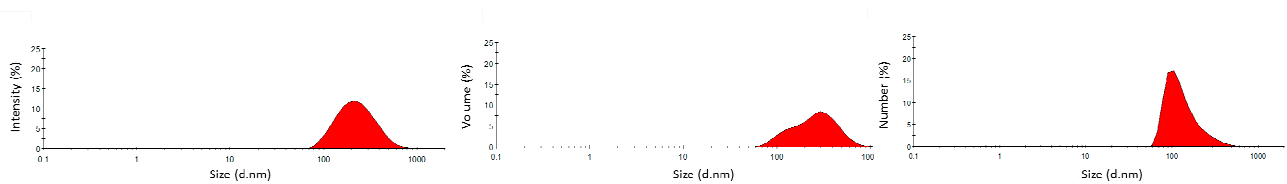

(b)

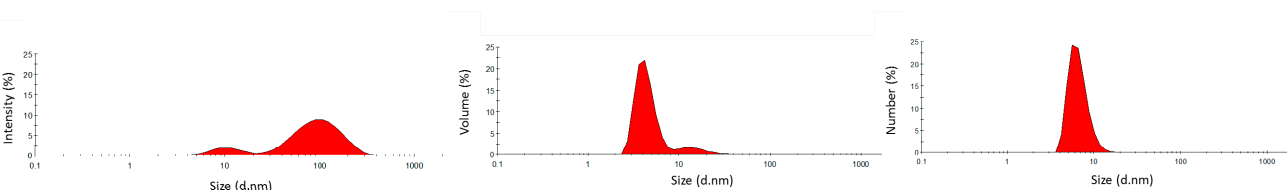

Figure 2. Cont.

(c)

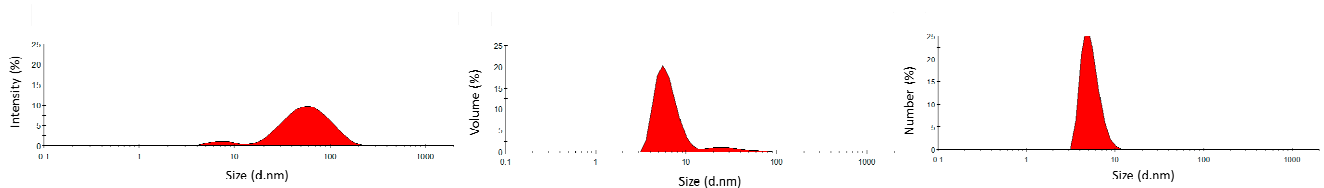

(d)

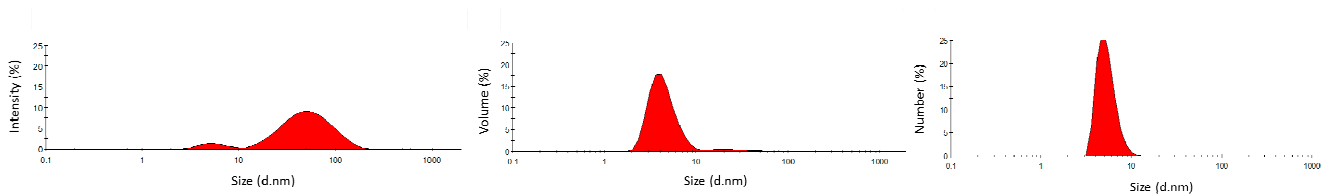

**Figure 2.** DLS size distribution frequency curves of NM-300K dispersion (93.45  $\mu\text{g/mL}$ ) in different complex culture media suspensions after 24 h incubation; L-15 culture medium (RTL-W1) (a), EMEM(pyr) culture medium (RTH-149) (b), EMEM(NEAA) culture medium (RTG-2) (c), and M199 culture medium (Primary hepatocytes) (d). Size is measured using diameter in nanometers (d.nm) and profiles are presented as intensity, volume and number distributions (left, centre and right).

(a)

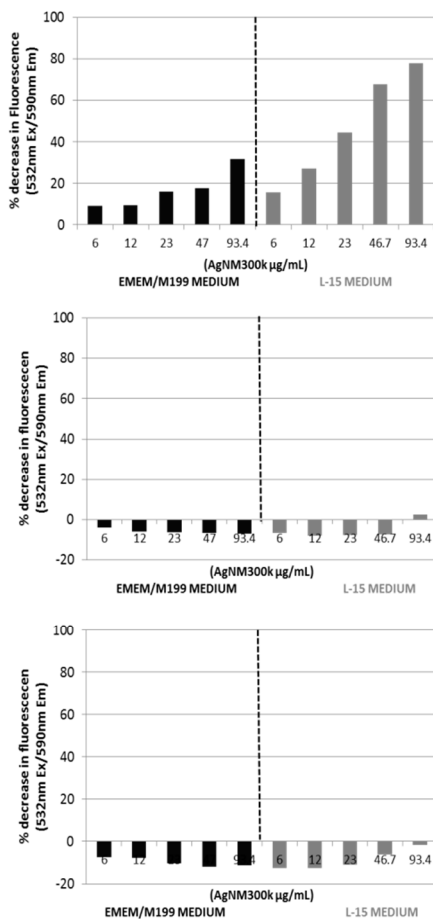

(b)

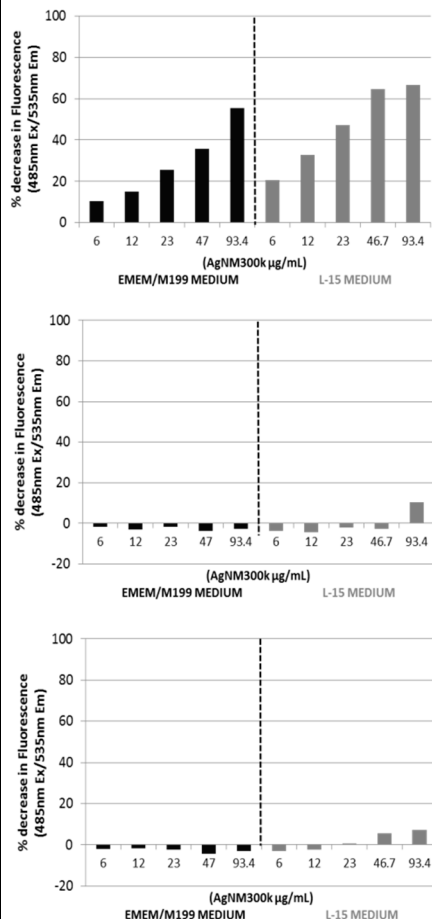

(c)

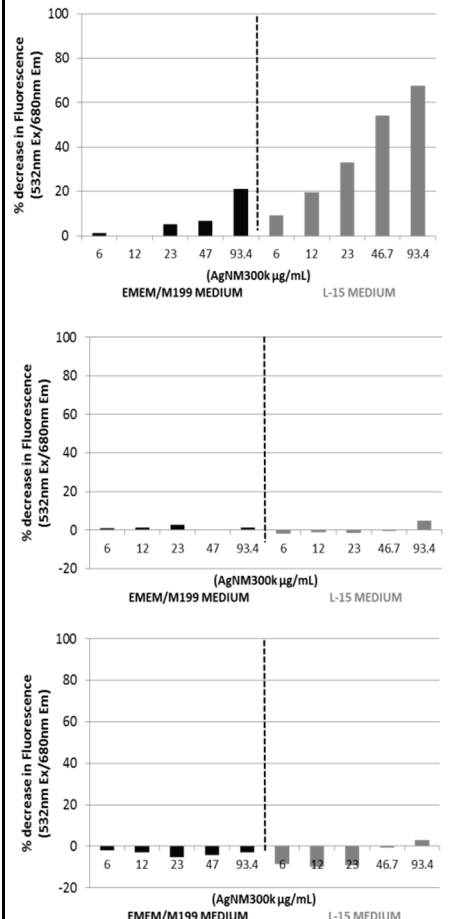

**Figure 3.** Investigating the potential interference of exposure concentration range of NM-300K suspensions (5.8 to 93.45  $\mu\text{g}/\text{mL}$ ) prepared in EMEM/M199 culture medium and L-15 culture medium with assay fluorescence readouts of AlamarBlue (**a**), CFDA-AM (**b**) and NRU (**c**) assays. Top: Cell-free suspensions following 24 h incubation in either EMEM/M199 or L-15 medium. Middle: Suspensions with cells following 24 h incubation in either EMEM/M199 or L-15 medium followed by washing steps. Bottom: Cells after wash step with PBS in presence of assay products (resorufin, CF, NR dye according to alamarBlue, CFDA-AM and NRU assay respectively). Interference is represented as % decrease in fluorescence compared to medium suspension only or assay products at respective wavelengths.

© 2015 by the authors; licensee MDPI, Basel, Switzerland. This article is an open access article distributed under the terms and conditions of the Creative Commons Attribution license (<http://creativecommons.org/licenses/by/4.0/>).
